# Supplementary material
Source: PubMed Central journal article supplement (PMC4294187)

**Supplementary Table 1.** Group differences in NK-1R BP identified with whole brain analyses

| Region                          | Peak MNI Coordinates |     |     | Ke    | Z-Value |
|---------------------------------|----------------------|-----|-----|-------|---------|
|                                 | x                    | y   | z   |       |         |
| <b>Healthy Control &gt; IBD</b> |                      |     |     |       |         |
| Prefrontal Cortex               |                      |     |     |       |         |
| Medial Frontal Gyrus            | 3                    | 18  | -20 | 625   | 3.79    |
| Middle Frontal Gyrus            | -29                  | 51  | -6  | 174   | 3.24    |
|                                 | 33                   | -2  | 59  | 702   | 3.71    |
|                                 | -39                  | 43  | 9   | 8285  | 4.15    |
| Posterior Insula                | -35                  | -15 | -2  | 47207 | 4.89    |
| Superior Frontal Gyrus          | 8                    | 5   | 67  | 40    | 3.17    |
| Parietal Lobe                   |                      |     |     |       |         |
| Posterior Cingulate Cortex      | 5                    | -56 | 21  | 17684 | 4.19    |
| Precentral Gyrus                | -29                  | -13 | 56  | 1581  | 3.90    |
| Medial Frontal Gyrus            | -5                   | -17 | 66  | 835   | 3.53    |
| Temporal Lobe                   |                      |     |     |       |         |
| Fusiform Gyrus                  | 30                   | -39 | -17 | 96    | 3.29    |
|                                 | -35                  | -40 | -25 | 469   | 3.61    |
| Inferior Temporal Gyrus         | 58                   | -27 | -22 | 403   | 3.67    |
| Middle Temporal Gyrus           | 52                   | -56 | -13 | 39    | 3.25    |
| Superior Temporal Gyrus         | 44                   | 8   | -22 | 89095 | 4.93    |
| Occipital Lobe                  |                      |     |     |       |         |
| Lingual Gyrus                   | 19                   | -83 | -8  | 21    | 3.16    |
|                                 | -24                  | -91 | -5  | 714   | 4.23    |
| Middle Occipital Gyrus          | 37                   | -86 | -2  | 48    | 3.29    |
| Striatum                        |                      |     |     |       |         |
| Caudate                         | 26                   | -14 | 19  | 1225  | 3.60    |
| <b>Healthy Control &gt; IBS</b> |                      |     |     |       |         |
| Anterior Mid Cingulate Cortex   | -8                   | 27  | 28  | 355   | 3.67    |

$p < .001$ ,  $ke > 20$

**Figure S1.** Scatter plot depicting the relationship between NK-1R availability in anterior insula and gastrointestinal symptom severity.

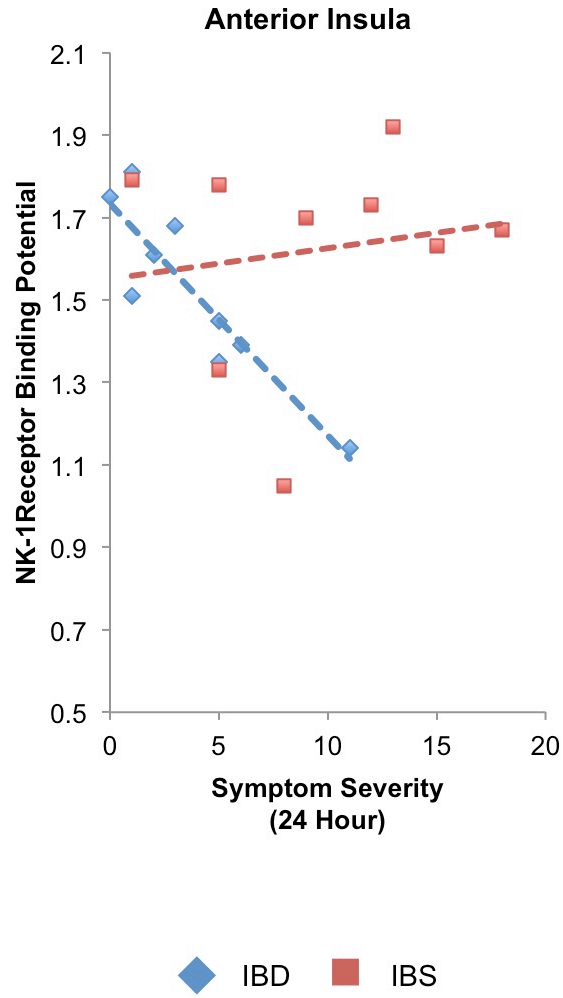

**Figure S2.** Scatter plot depicting the relationship between NK-1R availability in mid insula and duration of illness.

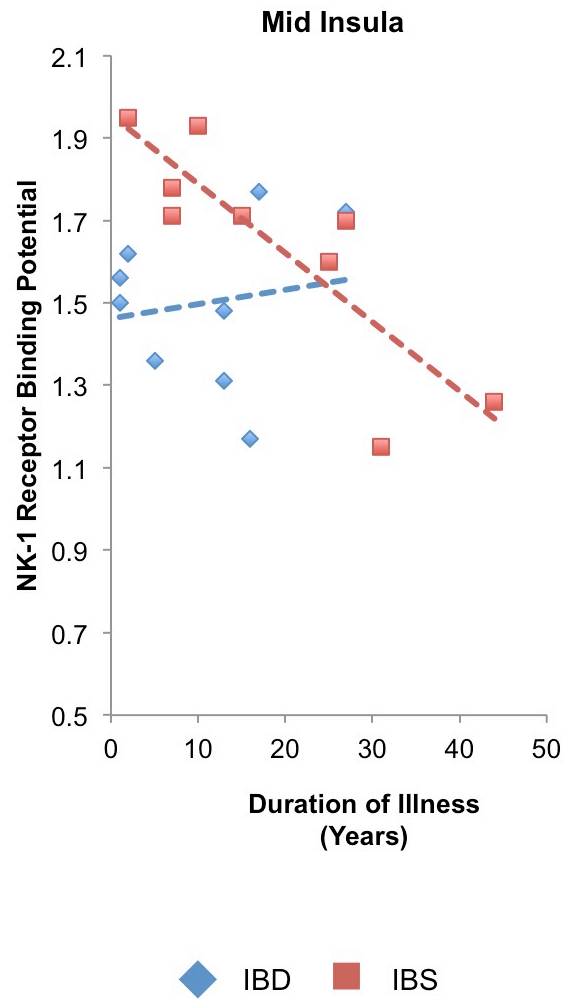

**Figure S3.** Scatter plot depicting the relationship between NK-1R availability in dorsolateral prefrontal cortex and pain threshold.

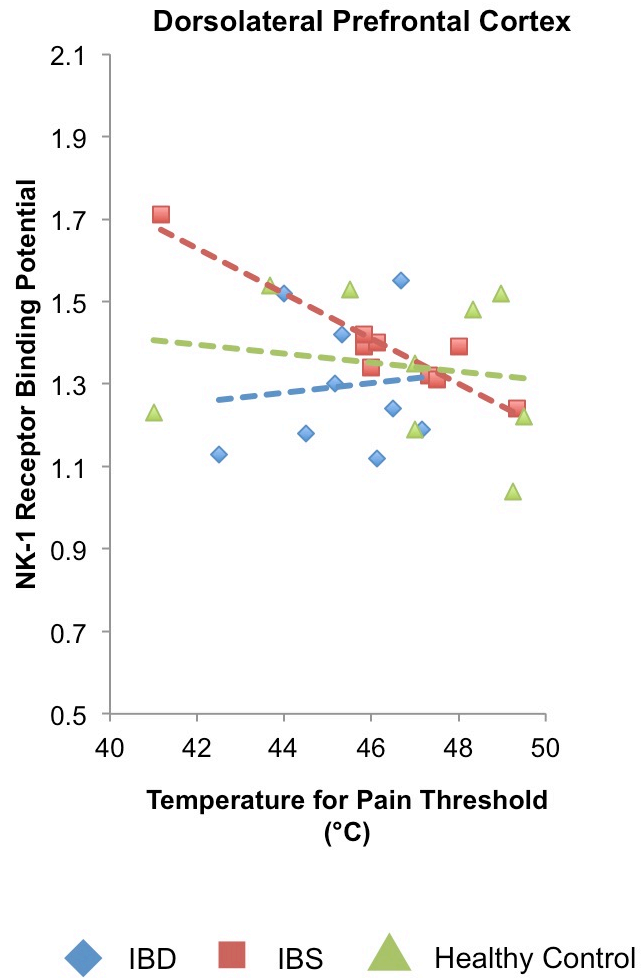

Supplement: NIHMS603671-supplement-Supplementary_Table_and_Figures_S1-S3.pdf [file NIHMS603671-supplement-Supplementary_Table_and_Figures_S1-S3.pdf]
